# Supplementary material for: The peroxisome counteracts oxidative stresses by suppressing catalase import via Pex14 phosphorylation
Source: eLife. 2020 Aug 24;9:e55896. doi: 10.7554/eLife.55896 (PMC7498260; doi:10.7554/eLife.55896)
Supplement: Figure 1—figure supplement 1—source data 1. [file elife-55896-fig1-figsupp1-data1.xlsx]

## Sheet: Sheet1
Figure1-figure supplement 1A. Little effect of H2O2 treatment on Pex14 level.
Pex14	Ex1	Ex2	Ex3	Ex4	Relative Avg	SD	SE
Band	Relative vol.
0 h - P14 Ex1	1	1	1	1	1	0	0
1 h (-)	1.09315	1.04266	0.930987	1.17688	1.06092	0.102795	0.0513974
2 h (-)	1.06214	1.00168	0.977592	1.19171	1.05828	0.0957995	0.0478998
5 h (-)	1.08988	0.937711	0.96556	1.17976	1.04323	0.112523	0.0562617
1 h (+)	1.20261	0.906626	0.861868	1.17571	1.0367	0.177328	0.0886641
2 h (+)	1.1275	0.851268	0.888256	1.04368	0.977675	0.1301	0.0650502
5 h (+)	0.894968	0.665153	0.706762	0.709584	0.744117	0.102598	0.0512992
LDH	Ex1	Ex2	Ex3	Ex4	Relative Avg.	SD	SE
Band	Relative vol.
0 h - P14 Ex1	1	1	1	1	1	0	0
1 h (-)	0.802316	1.02724	0.972069	1.1725	0.993531	0.15296	0.0764799
2 h (-)	0.765464	0.997433	1.02166	1.09271	0.969318	0.14179	0.0708948
5 h (-)	0.851816	0.94208	1.14109	0.951102	0.971522	0.121609	0.0608044
1 h (+)	0.961717	0.865184	1.09596	0.92843	0.962823	0.0973708	0.0486854
2 h (+)	0.982182	0.733951	0.892623	0.766264	0.843755	0.114908	0.0574542
5 h (+)	0.82648	0.742115	0.735627	0.563279	0.716875	0.110444	0.055222
Pex14/LDH	Ex1	Ex2	Ex3	Ex4	Relative Avg.	SD	SE
Band	Pex14/LDH ratio
0 h - P14 Ex1	1	1	1	1	1	0	0
1 h (-)	1.36249	1.01501	0.957738	1.00373	1.08474	0.186814	0.0934069
2 h (-)	1.38758	1.00425	0.956863	1.0906	1.10982	0.193269	0.0966346
5 h (-)	1.27948	0.995362	0.846174	1.24042	1.09036	0.205697	0.102849
1 h (+)	1.25049	1.0479	0.786403	1.26634	1.08778	0.224184	0.112092
2 h (+)	1.14795	1.15984	0.995108	1.36203	1.16623	0.150551	0.0752754
5 h (+)	1.08287	0.896294	0.960761	1.25974	1.04991	0.159853	0.0799266
