# Supplementary material for: The peroxisome counteracts oxidative stresses by suppressing catalase import via Pex14 phosphorylation
Source: eLife. 2020 Aug 24;9:e55896. doi: 10.7554/eLife.55896 (PMC7498260; doi:10.7554/eLife.55896)
Supplement: Figure 2—source data 1. [file elife-55896-fig2-data1.xlsx]

## Sheet: PeptideGroups
Fig. 2C. Quantification of phosphorylated Pex14 upon H2O2-treatment.
Annotated Sequence	Phosphorylation site	# PSMs	Master Protein Accessions	Positions in Master Proteins	Abundances: H2O2-#1	Abundances: H2O2-#2	Abundances: H2O2-#3	Abundances: vehicle-#1	Abundances: vehicle-#2	Abundances: vehicle-#3	H2O2/vehicle	p-value
[M].ASSEQAEQPNQPSSSPGSENVVPR.[E]	pS3 or pS4	4	Q642G4	Q642G4 [2-25]	269880	214461	333114	76197.4	119328	166651	2.25706	0.0244178
[K].IPSWQIPVKSPSPSSPAAVNHHSSSDISPVSNESPSSSPGK.[D]	pS247	2	Q642G4	Q642G4 [238-278]	1.16027e+06	1.26068e+06	2.66665e+06	14627.7	28486.8	5468.79	104.719	0.0259601
[R].QFPPSPSAPK.[I]	pS232	15	Q642G4	Q642G4 [228-237]	2.28241e+06	3.68657e+06	3.60219e+06	108202	135092	196838	21.7461	0.00260575
[K].SPSPSSPAAVNHHSSSDISPVSNESPSSSPGK.[D]	pS252	21	Q642G4	Q642G4 [247-278]	2.81131e+06	2.02793e+06	3.42042e+06	945070	584012	510740	4.0492	0.00815667
