# Supplementary material for: The peroxisome counteracts oxidative stresses by suppressing catalase import via Pex14 phosphorylation
Source: eLife. 2020 Aug 24;9:e55896. doi: 10.7554/eLife.55896 (PMC7498260; doi:10.7554/eLife.55896)
Supplement: Figure 3—source data 1. [file elife-55896-fig3-data1.xlsx]

## Sheet: Sheet1
Figure 3C. Quantification of the data in Figure 3B and those for PTS1 proteins in Figure 3 – figure supplement 1B.
anti-Catalase/g14C
		total	Ps (exclusively)	No Ps/partial	Ps (%)	Ps Avg. (%)	Ps (relative)	Ps Avg. (relative)	SD	SE
	WT	99	76	23	76.7677	74.2312	100	100	0	0
		54	41	13	75.9259		100
		50	35	15	70		100
	S232A	49	42	7	85.7143	76.221	111.654	102.192	14.7762	8.53104
		54	45	9	83.3333		109.756
		52	31	21	59.6154		85.1648
	S232D	49	16	33	32.6531	37.9121	42.5349	51.3482	8.95556	5.1705
		49	19	30	38.7755		51.0702
		52	22	30	42.3077		60.4396
	2SA	53	40	13	75.4717	69.318	98.3118	93.1927	5.83798	3.37056
		53	38	15	71.6981		94.4317
		51	31	20	60.7843		86.8347
	2SD	55	49	6	89.0909	76.2302	116.053	101.944	22.6636	13.0848
		52	45	7	86.5385		113.977
		49	26	23	53.0612		75.8017
	3SA	51	40	11	78.4314	78.9499	102.167	106.639	8.65742	4.99836
		56	43	13	76.7857		101.132
		49	40	9	81.6327		116.618
	3SD	51	6	45	11.7647	15.1242	15.3251	20.5918	6.61137	3.81708
		50	7	43	14		18.439
		51	10	41	19.6078		28.0112
	mock	51	0	51	0	0	0	0	0	0
		50	0	50	0		0
		50	0	50	0		0
anti-PTS1/g14C
		total	Ps (exclusively)	No Ps/partial	Ps (%)	Ps Avg. (%)	Ps (relative)	Ps Avg. (relative)	SD	SE
	WT	51	46	5	90.1961	91.4756	100	100	0	0
		50	45	5	90		100
		52	49	3	94.2308		100
	S232A	52	47	5	90.3846	87.9604	100.209	96.119	5.59453	3.23
		52	42	10	80.7692		89.7436
		55	51	4	92.7273		98.4045
	S232D	51	45	6	88.2353	83.0528	97.8261	90.9307	8.35981	4.82654
		50	42	8	84		93.3333
		52	40	12	76.9231		81.6327
	2SA	49	48	1	97.9592	94.0387	108.607	102.876	5.43349	3.13703
		50	46	4	92		102.222
		51	47	4	92.1569		97.7991
	2SD	50	46	4	92	90.7974	102	99.3121	3.23734	1.86908
		51	46	5	90.1961		100.218
		51	46	5	90.1961		95.7183
	3SA	53	51	2	96.2264	94.1887	106.686	103.008	3.35486	1.93693
		50	46	4	92		102.222
		53	50	3	94.3396		100.116
	3SD	52	34	18	65.3846	68.4741	72.4916	74.9316	6.42792	3.71116
		50	37	13	74		82.2222
		53	35	18	66.0377		70.0809
	mock	50	0	50	0	0	0	0	0	0
		52	0	52	0		0
		54	0	54	0		0
		PTS1 (relative)		Catalase (relative)
		Ps Avg. (%)	SE	Ps Avg. (%)	SE
	WT	100	0	100	0
	S232A	96.119	3.23	102.192	8.53104
	S232D	90.9307	4.82654	51.3482	5.1705
	2SA	102.876	3.13703	93.1927	3.37056
	2SD	99.3121	1.86908	101.944	13.0848
	3SA	103.008	1.93693	106.639	4.99836
	3SD	74.9316	3.71116	20.5918	3.81708
