# Supplementary material for: The peroxisome counteracts oxidative stresses by suppressing catalase import via Pex14 phosphorylation
Source: eLife. 2020 Aug 24;9:e55896. doi: 10.7554/eLife.55896 (PMC7498260; doi:10.7554/eLife.55896)
Supplement: Figure 4—source data 1. [file elife-55896-fig4-data1.xlsx]

## Sheet: Figure 4D
Figure 4D. Catalase in cytosolic fraction was increased in Pex14-S232D-expressing cells.
		RawIntDen-BG	RawIntDen-BG	RawIntDen-BG
		1st	2nd	3rd
	K1-S	10159	9895	11827
	K1-P	25206	29494	33448
	161-S	23263	32895	59668
	161-P	7087	5137	7099
	WT-6-S	15447	13225	48883
	WT-6-P	29798	36543	77234
	SA-13-S	8778	3148	19401
	SA-13-P	26957	29616	75392
	SD-30-29-S	34151	47119	85049
	SD-30-29-P	23464	14400	57488
		S/S+P	S/S+P	S/S+P
		1st	2nd	3rd	Average	SD	SE
	K1	0.287261	0.251212	0.261226	0.266567	0.0186085	0.0107436
	ZP161	0.766491	0.86493	0.893675	0.841698	0.0666986	0.0385085
	WT-6	0.341408	0.265733	0.3876	0.33158	0.0615252	0.0355216
	SA-13	0.245642	0.0960811	0.204667	0.18213	0.0772853	0.0446207
	SD-30	0.592745	0.765926	0.59668	0.651784	0.0988697	0.0570824

## Sheet: Figure 4G
Figure 4G. 35S-labelled bands in Figure 4F were quantified.
Catalase		1st	2nd
	Name	Volume	Volume
1	0 h-S	782582	538260
2	0 h-P	502008	445370
3	1 h (-)-S	792334	364130
4	1 h (-)-P	911348	570509
5	1 h (H2O2)-S	705182	575569
6	1 h (H2O2)-P	455915	593180
		P/(S+P) ratio	P/(S+P) ratio	Avg	SE	SD
	0 h	0.390792	0.452782	0.421787	0.0309951	0.0438337
	1 h (-)	0.534928	0.610406	0.572667	0.0377388	0.0533707
	1 h (H2O2)	0.392659	0.507534	0.450096	0.0574376	0.0812291
DHAPAT		Volume
	Name
1	0 h-S	308396
2	0 h-P	104845
3	1 h (-)-S	388405
4	1 h (-)-P	207582
5	1 h (H2O2)-S	375672
6	1 h (H2O2)-P	246945
		P/(S+P) ratio
	0 h	0.253715
	1 h (-)	0.3483
	1 h (H2O2)	0.396625
