# Supplementary material for: The peroxisome counteracts oxidative stresses by suppressing catalase import via Pex14 phosphorylation
Source: eLife. 2020 Aug 24;9:e55896. doi: 10.7554/eLife.55896 (PMC7498260; doi:10.7554/eLife.55896)
Supplement: Figure 6—source data 1. [file elife-55896-fig6-data1.xlsx]

## Sheet: Sheet1
Figure 6. Phosphorylation at Ser232 of Pex14 is important for cell resistance to exogenous hydrogen peroxide.
			Average (%)
	16 h treat		1st 170712	2nd	3rd	Average (%)	SD	SE
CHO-K1	no		100	100	100	100
CHO-K1	0.8 mM H2O2		28.5714	41.0745	14.4765	28.0408	13.307	7.68277
CHO-K1	0.8 mM H2O2 + 20 mM 3AT		3.55286	2.58126	3.31878	3.15097	0.507071	0.292758
ZP161	no		100	100	100	100
ZP161	0.8 mM H2O2		65.9595	64.389	59.5701	63.3062	3.32949	1.92228
ZP161	0.8 mM H2O2 + 20 mM 3AT		3.28515	2.48691	1.86335	2.54514	0.712685	0.411469
161/P14-WT	no		100	100	100	100
161/P14-WT	0.8 mM H2O2		47.3	37.0588	20.0374	34.7987	13.7711	7.95076
161/P14-WT	0.8 mM H2O2 + 20 mM 3AT		4.11765	2.48042	2.55517	3.05108	0.924432	0.533721
161/P14-SA	no		100	100	100	100
161/P14-SA	0.8 mM H2O2		13.6	25.6757	3.05536	14.1103	11.3188	6.53491
161/P14-SA	0.8 mM H2O2 + 20 mM 3AT		4.95495	3.37838	2.75716	3.69683	1.13298	0.654125
161/P14-SD-30	no		100	100	100	100
161/P14-SD-30	0.8 mM H2O2		77	80.4322	66.5372	74.6565	7.23784	4.17877
161/P14-SD-30	0.8 mM H2O2 + 20 mM 3AT		4.44178	1.86698	3.65854	3.32243	1.3199	0.762042
